# Supplementary material for: Fast patterning of oriented organic microstripes for field-effect ammonia gas sensors
Source: Royal Society of Chemistry journal article supplement (doi:10.1039/c5nr09001f), 2016-01-01
Supplement: c5nr09001f1.pdf [file c5nr09001f1.pdf]

## **Fast Patterning of Oriented Organic Microstripes for Field-effect**

### **Ammonia Gas Sensors**

Binghao Wang,<sup>a,b</sup> Jinqiang Ding,<sup>a</sup> Tao Zhu,<sup>a</sup> Wei Huang,<sup>b</sup> Zequn Cui,<sup>a</sup> Jianmei Chen,<sup>a</sup> Lizhen Huang\*,<sup>a</sup>  
Lifeng Chi\*<sup>a</sup>

<sup>a</sup> Institute of Functional Nano & Soft Materials (FUNSOM), Jiangsu Key Laboratory for Carbon-Based Functional Materials and Devices, Soochow University, Suzhou 215123, China.

<sup>b</sup> Department of Chemistry, Northwestern University, 2145 Sheridan Road, Evanston, Illinois 60208, USA.

S1.

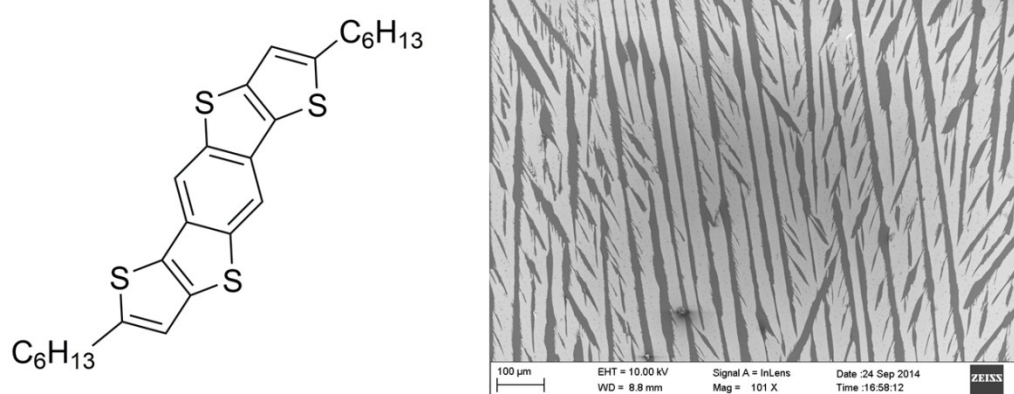

Fig. S1 Molecular structure of DTBDT-C6 molecule and SEM image of DTBDT-C6 microstripes dip-coated on bare SiO<sub>2</sub>/Si substrate and evaporated in toluene,

S2.

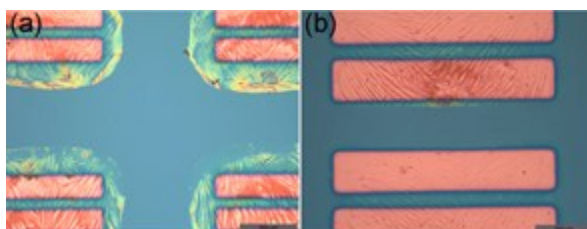

Fig. S2 The area-selective behavior of DTBDT-C6 on hydrophobic surfaces with different geometry of the gold electrodes. The treatment time with OTS is 6 h, pulling direction is upwards, lifting rate is 2000 μm/s and scale bar is 500 μm.

S3.

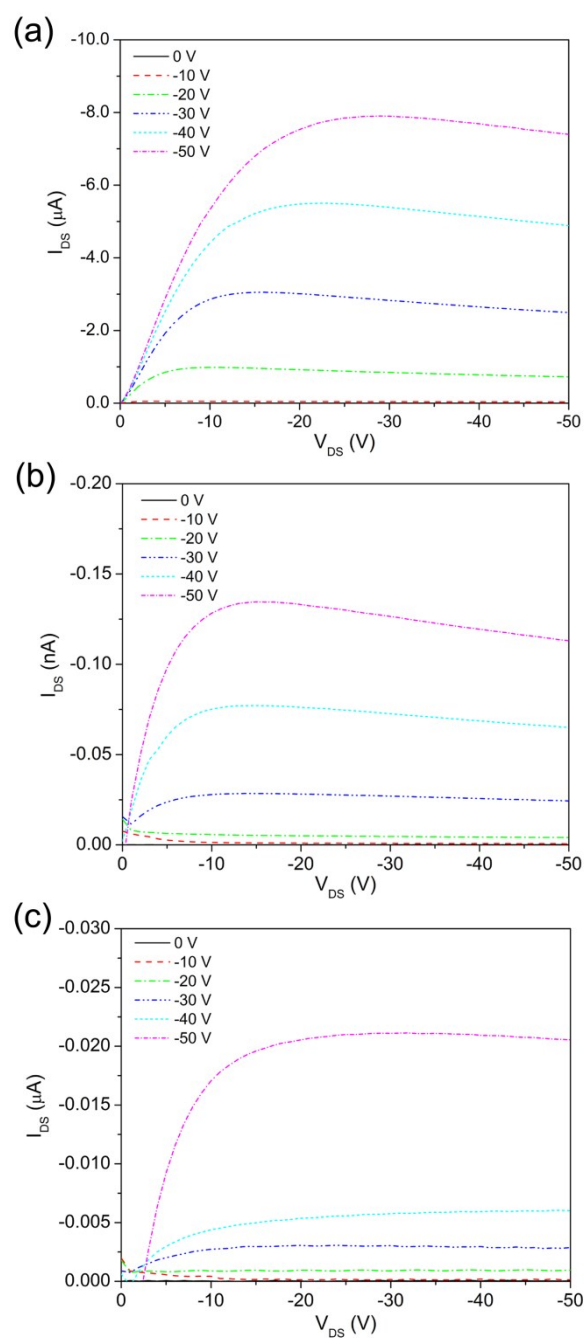

Fig. S3. Output characteristics of top-contact OFETs with DTBBDT-C6 microstripes grown on (a) Si/SiO<sub>2</sub> substrate, Output characteristics of bottom-contact OFETs with DTBBDT-C6 microstripes grown on (b) Si/SiO<sub>2</sub> substrate treated with OTS for 6 h and evaporated in the toluene vapor atmosphere slowly, (c) Si/SiO<sub>2</sub> substrate treated with OTS for 6 h and evaporated fast in air. The channel length is 50  $\mu\text{m}$ .

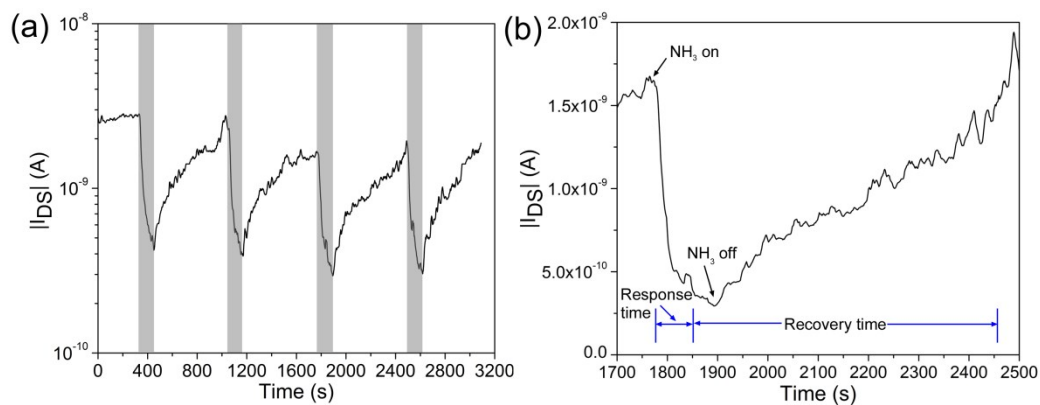

Fig. S4 (a) Sensing curve, i.e., plot of absolute source-drain current versus time with exposure to  $\text{NH}_3/\text{N}_2$  mixed gas or pure  $\text{N}_2$ .  $V_{GS}$  and  $V_{DS}$  are fixed at  $-40$  V. The grey bars indicate the exposure of 50 ppm  $\text{NH}_3/\text{N}_2$  mixed gas. (b) Enlarged panel in (a), showing the detailed shape of sensing curves and definition of response/recovery time.

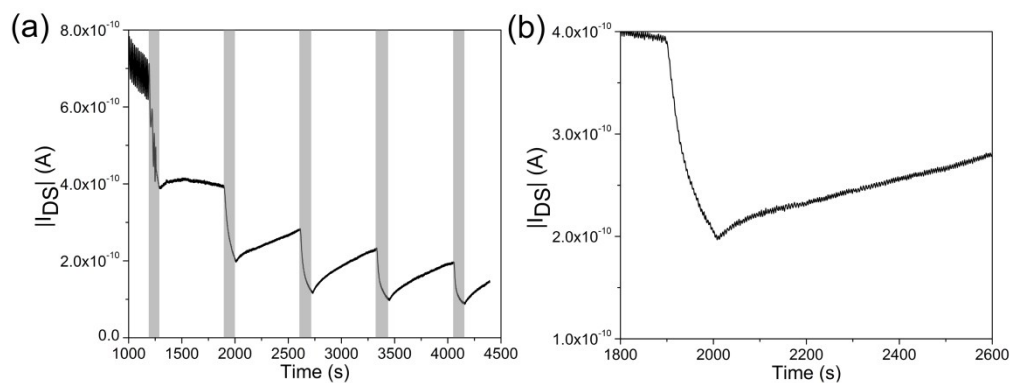

Fig. S5 Plot of absolute source-drain current versus time with exposure to  $\text{NH}_3/\text{N}_2$  mixed gas or pure  $\text{N}_2$  for patterned OFETs with microstripes evaporated in toluene vapor.  $V_{GS}$  and  $V_{DS}$  are fixed at  $-40$  V. The grey bars indicate the exposure of 50 ppm  $\text{NH}_3/\text{N}_2$  mixed gas.

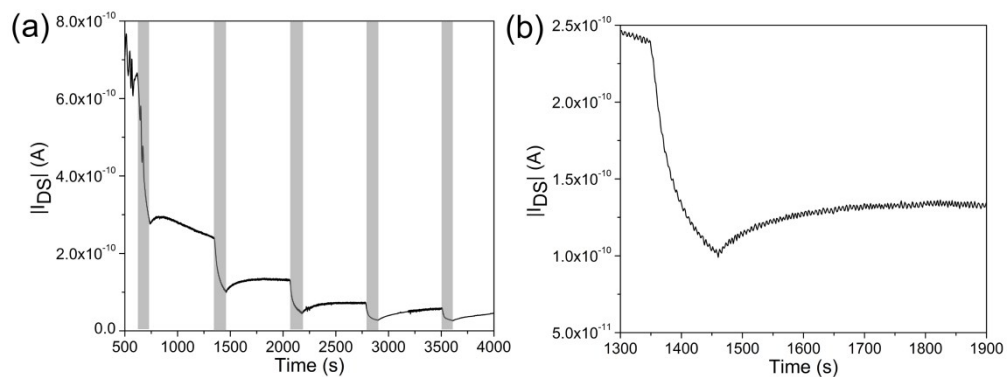

Fig. S6 Plot of absolute source-drain current versus time with exposure to  $\text{NH}_3/\text{N}_2$  mixed gas or pure  $\text{N}_2$  for patterned OFETs with microstripes evaporated in air.  $V_{GS}$  and  $V_{DS}$  are fixed at -40 V. The grey bars indicate the exposure of 50 ppm  $\text{NH}_3/\text{N}_2$  mixed gas.
